# Supplementary material for: Prevalence Trend and Disparities in Rheumatoid Arthritis among US Adults, 2005–2018
Source: MDPI journal article supplement (doi:10.3390/jcm10153289), 2021-07-26
Supplement: s1 [file s1]

**Supplementary Table S1.** Risk factors related to rheumatoid arthritis for men and women of the study sample in 7 National Health and Nutrition Examination Surveys, from 2005 to 2018

|                                          | 2005-2006<br>(n=4,459) | 2007-2008<br>(n=5,084) | 2009-2010<br>(n=5,399) | 2011-2012<br>(n=4,801) | 2013-2014<br>(n=5,094) | 2015-2016<br>(n=4,846) | 2017-2018<br>(n=4,488) |
|------------------------------------------|------------------------|------------------------|------------------------|------------------------|------------------------|------------------------|------------------------|
| Men, unweighted<br>No. (Weighted %)      |                        |                        |                        |                        |                        |                        |                        |
| Obesity                                  | 680 (33.00)            | 841(32.22)             | 938 (36.00)            | 757 (33.56)            | 806 (35.15)            | 847 (38.62)            | 865 (43.32)            |
| Current smoker                           | 560 (27.50)            | 647 (25.94)            | 628 (21.90)            | 599 (23.61)            | 561 (21.06)            | 530 (20.09)            | 477 (19.46)            |
| Physical inactive                        | 170 (6.13)             | 564 (14.56)            | 604 (17.48)            | 469 (16.76)            | 496 (18.72)            | 493 (15.96)            | 449 (15.67)            |
| Women,<br>unweighted No.<br>(Weighted %) |                        |                        |                        |                        |                        |                        |                        |
| Obesity                                  | 901 (35.90)            | 1020 (35.02)           | 1140 (36.49)           | 980 (36.60)            | 1122 (40.68)           | 1122 (41.43)           | 1024 (42.97)           |
| Current smoker                           | 413 (20.49)            | 503 (19.90)            | 551 (19.09)            | 369 (16.03)            | 491 (19.32)            | 381 (15.94)            | 340 (15.53)            |
| Physical inactive                        | 274 (10.06)            | 899 (27.69)            | 895 (28.26)            | 717 (24.89)            | 811 (28.65)            | 776 (25.20)            | 692 (25.00)            |

**Supplementary Figure S1.** Age-adjusted prevalence of rheumatoid arthritis by weight status in different race groups, 2005-2006 through 2017-2018 Figure (a) shows the prevalence of Non-Hispanic Caucasian by weight status; Figure (b) shows the prevalence of Hispanic by race by weight status; Figure (c) shows the prevalence of Non-Hispanic African American by race by weight status

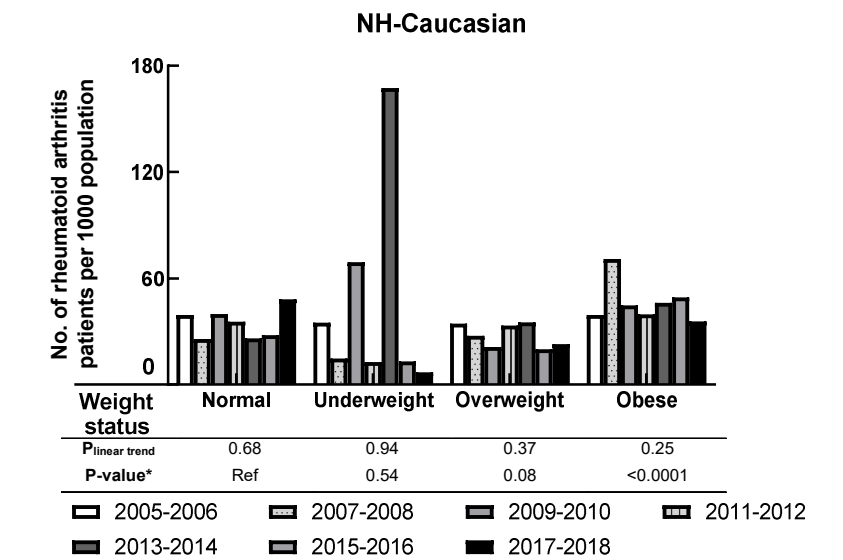

(a)

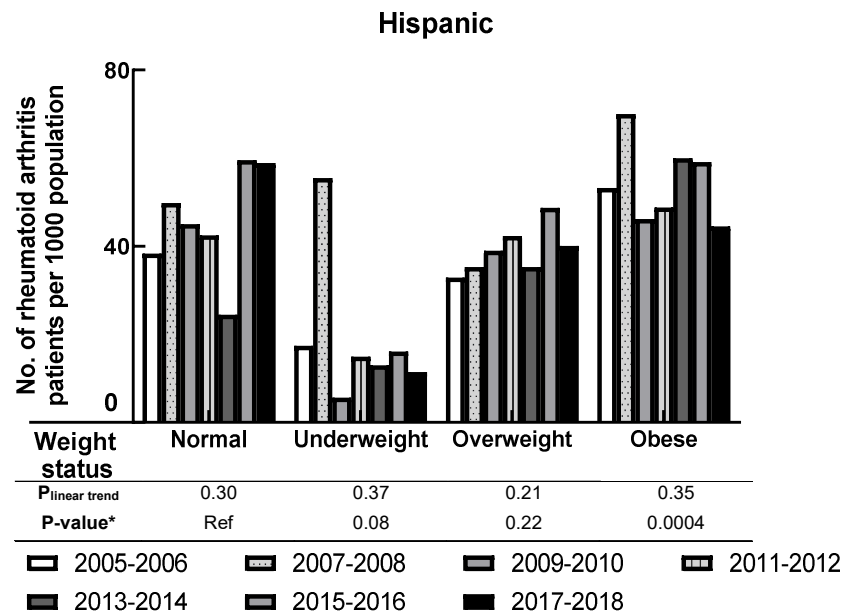

(b)

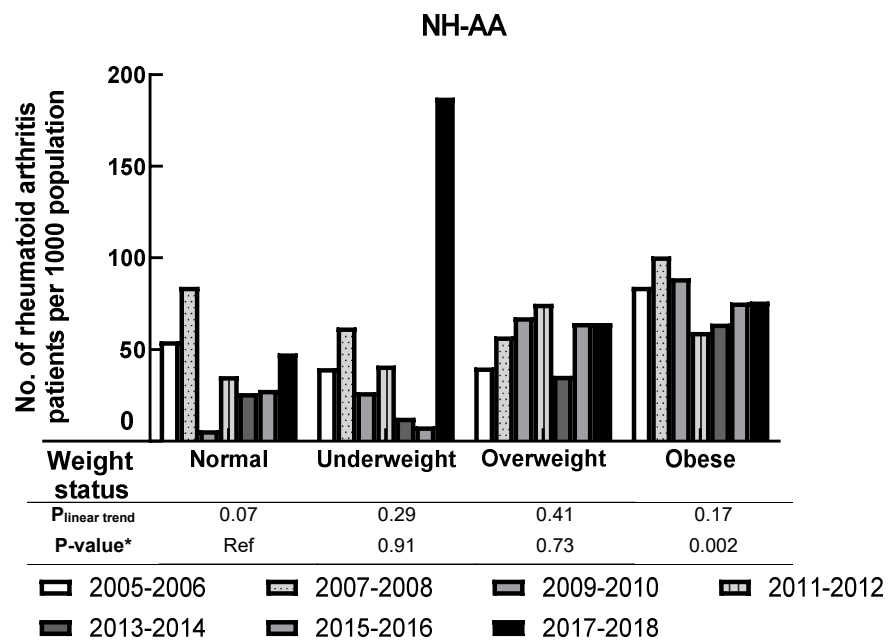

(c)
